# Supplementary material
Source: publisher figshare collection journal article supplement (https://sage.figshare.com/ndownloader/files/14701796)
Supplement: Supplementary file 1 [file 14701796]

Comparative Medicine Branch Occupational Risk Assessment Form

|                        |                   |                                                          |                                   |           |           |
|------------------------|-------------------|----------------------------------------------------------|-----------------------------------|-----------|-----------|
| CMB Risk Assessment #: | Risk Assessor(s): | Risk Assessment date(s):                                 |                                   | Location: | Job/Task: |
|                        |                   | Gap Analysis:<br>Trial Run:<br>Review:<br>Annual Survey: |                                   |           |           |
| CMB SOPs:              | Personnel:        | Pathogens of Concern:                                    | Ongoing Research (Customer Labs): | PPE:      | Training: |
|                        |                   |                                                          |                                   |           |           |
| Medical Surveillance:  |                   |                                                          |                                   |           |           |

|     | Procedure | Identified hazards | Current Mitigations | Current Risk: $R_c=L*M*T*N*C$ |   |   |   |   |       | Gap analysis & recommended mitigations | Performance: Trial run observations | Review & recommendations | Justified Risk acceptance | Adjusted Risk: $R_a=L*M*T*N*C$ |   |   |   |   |       | Contingency plans |
|-----|-----------|--------------------|---------------------|-------------------------------|---|---|---|---|-------|----------------------------------------|-------------------------------------|--------------------------|---------------------------|--------------------------------|---|---|---|---|-------|-------------------|
|     |           |                    |                     | L                             | M | T | N | C | $R_c$ |                                        |                                     |                          |                           | L                              | M | T | N | C | $R_a$ |                   |
| SOP |           |                    |                     |                               |   |   |   |   |       |                                        |                                     |                          |                           |                                |   |   |   |   |       |                   |
|     |           |                    |                     |                               |   |   |   |   |       |                                        |                                     |                          |                           |                                |   |   |   |   |       |                   |
|     |           |                    |                     |                               |   |   |   |   |       |                                        |                                     |                          |                           |                                |   |   |   |   |       |                   |
|     |           |                    |                     |                               |   |   |   |   |       |                                        |                                     |                          |                           |                                |   |   |   |   |       |                   |
| SOP |           |                    |                     |                               |   |   |   |   |       |                                        |                                     |                          |                           |                                |   |   |   |   |       |                   |
|     |           |                    |                     |                               |   |   |   |   |       |                                        |                                     |                          |                           |                                |   |   |   |   |       |                   |
|     |           |                    |                     |                               |   |   |   |   |       |                                        |                                     |                          |                           |                                |   |   |   |   |       |                   |
|     |           |                    |                     |                               |   |   |   |   |       |                                        |                                     |                          |                           |                                |   |   |   |   |       |                   |
| SOP |           |                    |                     |                               |   |   |   |   |       |                                        |                                     |                          |                           |                                |   |   |   |   |       |                   |
|     |           |                    |                     |                               |   |   |   |   |       |                                        |                                     |                          |                           |                                |   |   |   |   |       |                   |
|     |           |                    |                     |                               |   |   |   |   |       |                                        |                                     |                          |                           |                                |   |   |   |   |       |                   |
|     |           |                    |                     |                               |   |   |   |   |       |                                        |                                     |                          |                           |                                |   |   |   |   |       |                   |

| Risk Matrix | Current Risk: $R_c=L*M*T*N*C$ or Adjusted Risk: $R_a=L*M*T*N*C$ |                                   |                     |                                  |                      |
|-------------|-----------------------------------------------------------------|-----------------------------------|---------------------|----------------------------------|----------------------|
|             | Likelihood of risk occurrence                                   | Mitigation Factors                | Task/Job Frequency  | Number of people who do the task | Consequence severity |
| Scale       | L                                                               | M                                 | T                   | N                                | C                    |
| 5           | FREQUENT                                                        | UNKNOWN/DON'T EXIST               | SEVERAL TIMES DAILY | ≥ 101                            | CATASTROPHIC         |
| 4           | LIKELY                                                          | DEFICIENCIES                      | DAILY               | 61-100                           | CRITICAL             |
| 3           | OCCASIONAL                                                      | WEAKNESSES/LACK OF IMPLEMENTATION | WEEKLY-MONTHLY      | 31-60                            | SERIOUS              |
| 2           | REMOTE                                                          | SUFFICIENT/ROOM FOR IMPROVEMENT   | MONTHLY-YEARLY      | 11-30                            | MINOR                |
| 1           | UNLIKELY                                                        | GOOD/WELL-IMPLEMENTED             | RARELY-REMOTELY     | 1-10                             | NEGLIGIBLE           |

|                |                  |
|----------------|------------------|
| Comments:      |                  |
| Date approved: |                  |
| Approved by:   |                  |
|                | AssessorDate     |
| Approved by:   |                  |
|                | Branch ChiefDate |
